# Supplementary material for: Migration and chemical reaction of H+ in protonated β-galactose
Source: Royal Society of Chemistry journal article supplement (doi:10.1039/c2cp41766a), 2012-01-01
Supplement: c2cp41766a.pdf [file c2cp41766a.pdf]

# Migration and Chemical Reaction of H<sup>+</sup> in Protonated β-D-Galactose

Lin Jin<sup>a</sup> and R. Benny Gerber<sup>a,b</sup>

<sup>a</sup> Department of Chemistry, University of California, Irvine, CA, 92697-2025, USA

<sup>b</sup> Institute of Chemistry and the Fritz Haber Research Center, The Hebrew University Jerusalem 91904, Israel. Email: benny@fh.huji.ac.il

## Supporting Information

**Table.** The energies and chemical potentials of conformers and transitions states.

|              | B3LYP/6-31G(d) |               | B3LYP/6-311++G(d,p) |               |                         |                     |
|--------------|----------------|---------------|---------------------|---------------|-------------------------|---------------------|
|              | E (a.u.)       | ΔE (kcal/mol) | E (a.u.)            | ΔE (kcal/mol) | CP (298.15K) (kcal/mol) | CP (40K) (kcal/mol) |
| <b>1</b>     | -687.149721    | 0.00          | -687.3984371        | 0.00          | 48.99                   | 9.84                |
| <b>2</b>     | -687.1417334   | 5.01          | -687.3899523        | 5.32          | 49.56                   | 10.09               |
| <b>3</b>     | -687.1388511   | 6.82          | -687.3887306        | 6.09          | 49.56                   | 9.87                |
| <b>TS1-2</b> | -687.1373019   | 7.79          | -687.3859429        | 7.84          | 48.79                   | 10.07               |
| <b>TS1-3</b> | -687.1335142   | 10.17         | -687.3853008        | 8.24          | 48.31                   | 9.50                |
| <b>TS2-3</b> | -687.1375441   | 7.64          | -687.3860057        | 7.80          | 48.03                   | 9.67                |

## Geometries of conformers and transition states

**1**

B3LYP/6-31G(d)

|   |               |               |               |
|---|---------------|---------------|---------------|
| C | -1.3107574612 | 1.0000571246  | 0.3543663374  |
| C | -1.5925239120 | -0.2749735908 | -0.4800243660 |
| C | -0.3642632040 | -1.1756471668 | -0.7014611984 |
| C | 0.4881806531  | -1.2969206491 | 0.5663697078  |
| C | 0.7833236020  | 0.0787222913  | 1.2169576545  |
| O | -0.4315127630 | 0.8176086912  | 1.4277958954  |
| O | -2.4719012807 | -1.1030588483 | 0.2628251836  |
| O | 0.4461379491  | -0.6840139928 | -1.8048163701 |
| C | 1.8764847925  | 0.9159417813  | 0.5484645804  |
| O | 1.5415989983  | 1.3369804157  | -0.8326500981 |

|   |               |               |               |
|---|---------------|---------------|---------------|
| H | -3.3843894957 | -0.7888921441 | 0.1614369565  |
| H | 1.2413959256  | 0.4860281578  | -1.3737148181 |
| H | 0.6550086667  | 1.8624756727  | -0.7887377234 |
| H | -2.0059713154 | 0.0220791257  | -1.4518688572 |
| H | -0.7395707372 | -2.1606503317 | -0.9885498841 |
| H | 1.1614195693  | -0.1032740881 | 2.2295534991  |
| H | 2.0458841041  | 1.8439759629  | 1.0954217214  |
| H | 2.8054965246  | 0.3534707624  | 0.4648517463  |
| O | -0.8597784078 | 2.0579957937  | -0.5341279973 |
| H | -2.2463323736 | 1.3311161375  | 0.8103752009  |
| H | -0.0860659901 | -1.8837247875 | 1.2912287181  |
| O | 1.7047441980  | -1.9334235026 | 0.1929624275  |
| H | 1.9192208877  | -2.6428674145 | 0.8179124296  |
| H | -1.0522940541 | 2.9186837781  | -0.1210767586 |
| H | 1.0712042259  | -1.3995150644 | -2.0283214997 |

B3LYP/6-311++G(d,p)

|   |               |               |               |
|---|---------------|---------------|---------------|
| C | -1.3044479588 | 1.0036980284  | 0.3595260552  |
| C | -1.5884779945 | -0.2788561832 | -0.4621543047 |
| C | -0.3534957723 | -1.1686475523 | -0.6940679169 |
| C | 0.4920426512  | -1.2915359054 | 0.5770773759  |
| C | 0.7953873095  | 0.0832618011  | 1.2208131711  |
| O | -0.4199703119 | 0.8246211776  | 1.4287296786  |
| O | -2.4648872756 | -1.1073552506 | 0.2865058402  |
| O | 0.4487493801  | -0.6473525931 | -1.7911958258 |
| C | 1.8935434629  | 0.9154429273  | 0.5588184321  |
| O | 1.5590176532  | 1.3451040094  | -0.8219781296 |
| H | -3.3827206647 | -0.8509524862 | 0.1434614809  |
| H | 1.2539502269  | 0.5084322524  | -1.3651809191 |
| H | 0.6952576962  | 1.8832766365  | -0.7821309566 |
| H | -2.0116090110 | 0.0100474547  | -1.4284712558 |
| H | -0.7178107356 | -2.1521495287 | -0.9911767765 |
| H | 1.1676856339  | -0.1003154641 | 2.2329370039  |
| H | 2.0670554782  | 1.8366973467  | 1.1114180994  |
| H | 2.8169419076  | 0.3475989725  | 0.4736341465  |
| O | -0.8428165509 | 2.0507551753  | -0.5368168064 |
| H | -2.2349318899 | 1.3403662172  | 0.8163371366  |
| H | -0.0945804604 | -1.8637096222 | 1.3002611655  |
| O | 1.7091775703  | -1.9466759388 | 0.2414740679  |
| H | 1.8563876351  | -2.7100582620 | 0.8096974482  |
| H | -1.1446443800 | 2.9124160817  | -0.2198874418 |
| H | 0.9999355025  | -1.3659351800 | -2.1324582814 |

2

B3LYP/6-31G(d)

|   |               |               |               |
|---|---------------|---------------|---------------|
| C | 1.2148128864  | -1.0515853099 | 0.3898355235  |
| C | 1.8203843619  | 0.1812941735  | -0.3065272795 |
| C | 0.6789659694  | 1.0363839581  | -0.8611823824 |
| C | -0.3653840722 | 1.3644386299  | 0.2285954495  |
| C | -0.7201248966 | 0.2020052623  | 1.2125651941  |
| O | 0.3433189513  | -0.7777975505 | 1.3927497588  |
| O | 2.4831319913  | 0.9717818109  | 0.6516865010  |
| O | 0.0719460556  | 0.2913042566  | -1.9335413558 |
| C | -2.0277013812 | -0.5568159720 | 0.9856048418  |
| O | -1.9337291752 | -1.3852790953 | -0.1920248660 |
| H | 3.3891776582  | 0.6510223383  | 0.7864283582  |
| H | -0.8538573752 | 0.6075664254  | -2.0011062128 |
| H | -2.7422042395 | -1.9173375902 | -0.2769579502 |
| H | 2.4748369105  | -0.1408296921 | -1.1277727717 |
| H | 1.0868853856  | 1.9707806117  | -1.2618473645 |
| H | -0.8207962127 | 0.6483232894  | 2.2055457128  |
| H | -2.2020349205 | -1.1866212320 | 1.8650854240  |
| H | -2.8463105489 | 0.1584288679  | 0.8743450228  |
| O | 0.4963821747  | -1.8628798009 | -0.7315492277 |
| H | 1.9518886821  | -1.7556696564 | 0.7746959702  |
| H | 0.0507002476  | 2.1771508888  | 0.8315004584  |
| O | -1.5712434429 | 1.7667847268  | -0.4194194985 |
| H | -1.5765337889 | 2.7315265928  | -0.5288610846 |
| H | -0.4487982858 | -2.0410366730 | -0.3891685732 |
| H | 0.2856489951  | -1.1624105358 | -1.4666244287 |

B3LYP/6-311++G(d,p)

|   |               |               |               |
|---|---------------|---------------|---------------|
| C | 1.2072450224  | -1.0513823325 | 0.3938275148  |
| C | 1.8161025376  | 0.1771174535  | -0.3041924616 |
| C | 0.6819453394  | 1.0372941212  | -0.8638694044 |
| C | -0.3643157681 | 1.3637746077  | 0.2204842668  |
| C | -0.7323715074 | 0.2017619941  | 1.2020194472  |
| O | 0.3328034901  | -0.7775418828 | 1.3899955596  |
| O | 2.4937951881  | 0.9612387536  | 0.6506395565  |
| O | 0.1026776689  | 0.2905218093  | -1.9497189557 |
| C | -2.0420698344 | -0.5558389753 | 0.9871366008  |
| O | -1.9318995420 | -1.4704411466 | -0.1273299060 |
| H | 3.4083862386  | 0.6744426455  | 0.7522351381  |
| H | -0.7672333696 | 0.6698821897  | -2.1544622835 |
| H | -2.7403596669 | -1.9902027230 | -0.2118632205 |
| H | 2.4674020583  | -0.1482155041 | -1.1225262268 |
| H | 1.0936966536  | 1.9716290678  | -1.2528867090 |

|   |               |               |               |
|---|---------------|---------------|---------------|
| H | -0.8317500899 | 0.6543510466  | 2.1901373429  |
| H | -2.2478061643 | -1.1254678876 | 1.8966339012  |
| H | -2.8462327968 | 0.1568378321  | 0.8018553157  |
| O | 0.4878027468  | -1.8636121637 | -0.7323078594 |
| H | 1.9418733691  | -1.7554823770 | 0.7776667832  |
| H | 0.0646798595  | 2.1619028122  | 0.8293507787  |
| O | -1.5535342141 | 1.8058637310  | -0.4303457965 |
| H | -1.6413245268 | 2.7632304141  | -0.3657280920 |
| H | -0.4558028408 | -2.0419813418 | -0.4005442723 |
| H | 0.2956520787  | -1.1891534196 | -1.4741517984 |

### 3

#### B3LYP/6-31G(d)

|   |               |               |               |
|---|---------------|---------------|---------------|
| C | -1.1836975740 | 1.2326894956  | -0.0316300846 |
| C | -1.7698511026 | -0.1702097677 | -0.2901210137 |
| C | -0.5995596387 | -1.1500386778 | -0.4624261460 |
| C | 0.2530008907  | -1.1722457434 | 0.8080696750  |
| C | 0.7427969845  | 0.2442017026  | 1.2228206535  |
| O | -0.2270911768 | 1.2901492884  | 0.9774903386  |
| O | -2.4903819404 | -0.6543770717 | 0.8190020601  |
| O | 0.2300449177  | -0.6932246098 | -1.6265240968 |
| C | 2.1350752655  | 0.6129448485  | 0.7085136814  |
| O | 2.2241630560  | 0.4926468469  | -0.7332405644 |
| H | -3.3988788808 | -0.3137055308 | 0.7965359398  |
| H | 1.2054153751  | -0.5290403222 | -1.3154218380 |
| H | 3.1577783604  | 0.4284736622  | -0.9946629632 |
| H | -2.3776909450 | -0.1343885999 | -1.2040781705 |
| H | -0.9418463090 | -2.1490177537 | -0.7332180710 |
| H | 0.8461466357  | 0.2456634698  | 2.3125899673  |
| H | 2.3493668607  | 1.6484580240  | 0.9927570564  |
| H | 2.8594363085  | -0.0554994261 | 1.1794909407  |
| O | -0.6644248696 | 1.6258129385  | -1.3275449516 |
| H | -1.9570987933 | 1.9453253731  | 0.2677357764  |
| H | -0.4089680786 | -1.5465079307 | 1.5960535251  |
| O | 1.4006327386  | -1.9865184169 | 0.6414799384  |
| H | 1.1828116808  | -2.9066089304 | 0.8608094984  |
| H | -0.1259834591 | 2.4321390145  | -1.2337543021 |
| H | -0.0570944113 | 0.2799703973  | -1.8191977717 |

#### B3LYP/6-311++G(d,p)

|   |               |               |               |
|---|---------------|---------------|---------------|
| C | -1.1907011946 | 1.2464280283  | -0.0096597917 |
| C | -1.7535086913 | -0.1612162928 | -0.2926167198 |
| C | -0.5731409409 | -1.1245979146 | -0.4824369653 |

|   |               |               |               |
|---|---------------|---------------|---------------|
| C | 0.2569448343  | -1.1640563993 | 0.7995207818  |
| C | 0.7592708139  | 0.2443437763  | 1.2161111055  |
| O | -0.2118438624 | 1.2934876185  | 0.9863554132  |
| O | -2.4820120446 | -0.6728658139 | 0.8017852057  |
| O | 0.2635649261  | -0.6405490010 | -1.6280121964 |
| C | 2.1538960353  | 0.5995824259  | 0.7004043437  |
| O | 2.2913430297  | 0.3706929011  | -0.7350127726 |
| H | -3.4049110492 | -0.3989894230 | 0.7545137954  |
| H | 1.2456530039  | -0.3807516060 | -1.2964143444 |
| H | 3.2013935943  | 0.1370881586  | -0.9559888307 |
| H | -2.3601435148 | -0.1162262081 | -1.2029431286 |
| H | -0.9052844408 | -2.1191262657 | -0.7727678499 |
| H | 0.8690133745  | 0.2419409939  | 2.3034407674  |
| H | 2.3512307880  | 1.6536934189  | 0.8998521521  |
| H | 2.8789729967  | -0.0237443855 | 1.2221257706  |
| O | -0.7055099706 | 1.6819816547  | -1.2938352711 |
| H | -1.9741607951 | 1.9246097611  | 0.3328190431  |
| H | -0.4252402109 | -1.5224477384 | 1.5733403205  |
| O | 1.3889056533  | -2.0098355746 | 0.6701160869  |
| H | 1.1828775867  | -2.8991911132 | 0.9784298506  |
| H | -0.3921912462 | 2.5953897182  | -1.2603411692 |
| H | -0.0803167802 | 0.2614515609  | -1.8972565192 |

## TS1-2

B3LYP/6-31G(d)

|   |               |               |               |
|---|---------------|---------------|---------------|
| C | 1.1042488346  | -1.2325952721 | 0.2005423518  |
| C | 1.8087523306  | 0.0393289882  | -0.3021657959 |
| C | 0.7616002405  | 1.0852850857  | -0.6815002449 |
| C | -0.2449129938 | 1.3214381790  | 0.4673421548  |
| C | -0.6899666296 | 0.0476593565  | 1.2641207577  |
| O | 0.2740143826  | -1.0519922906 | 1.2467559507  |
| O | 2.5494279177  | 0.5851268267  | 0.7659163363  |
| O | 0.1122694561  | 0.6061734389  | -1.8676545626 |
| C | -2.0430090915 | -0.5443867527 | 0.8749259287  |
| O | -2.0546208412 | -1.0259432761 | -0.4869455130 |
| H | 3.4117167369  | 0.1454600428  | 0.8406087286  |
| H | -2.1453846854 | -0.2520616089 | -1.0729305120 |
| H | -0.7465599517 | -1.6677632110 | -0.7875160243 |
| H | 2.4294751352  | -0.1914331529 | -1.1787752919 |
| H | 1.2708177904  | 2.0302383574  | -0.8970058522 |
| H | -0.7475629844 | 0.3078260865  | 2.3251360310  |
| H | -2.2431865160 | -1.4164961257 | 1.5003853353  |
| H | -2.8447628755 | 0.1838999302  | 1.0084032423  |

|   |               |               |               |
|---|---------------|---------------|---------------|
| O | 0.2790085719  | -1.8304446326 | -1.0129026619 |
| H | 1.7777139541  | -2.0544886660 | 0.4402325503  |
| H | 0.2472398659  | 1.9945218422  | 1.1755689318  |
| O | -1.3780795144 | 1.9460955926  | -0.1386946656 |
| H | -1.6825642857 | 2.6894852213  | 0.4045350065  |
| H | 0.3953623599  | -1.2264479784 | -1.7904861710 |
| H | -0.4250369895 | 1.3280825084  | -2.2347646528 |

B3LYP/6-311++G(d,p)

|   |               |               |               |
|---|---------------|---------------|---------------|
| C | 1.1094662473  | -1.2175914814 | 0.2022698054  |
| C | 1.8072636410  | 0.0566011944  | -0.3006955259 |
| C | 0.7586886474  | 1.1082023955  | -0.6630715057 |
| C | -0.2230701793 | 1.3316330953  | 0.5029459931  |
| C | -0.7160031602 | 0.0436117738  | 1.2350012500  |
| O | 0.2597049232  | -1.0461892290 | 1.2346399174  |
| O | 2.5760286630  | 0.5881537268  | 0.7570829221  |
| O | 0.1006327360  | 0.6381174541  | -1.8464740855 |
| C | -2.0658870435 | -0.5482536252 | 0.8332443740  |
| O | -2.0362305819 | -1.1945834648 | -0.4657666278 |
| H | 3.4592970003  | 0.2023087381  | 0.7757372641  |
| H | -2.4225092581 | -0.6184538329 | -1.1368558611 |
| H | -0.7194364526 | -1.6938252348 | -0.8012019428 |
| H | 2.4153591537  | -0.1715788220 | -1.1831480044 |
| H | 1.2689243116  | 2.0516472993  | -0.8738314352 |
| H | -0.8106161439 | 0.2901473810  | 2.2947531878  |
| H | -2.3258819628 | -1.3294627166 | 1.5473180504  |
| H | -2.8362839288 | 0.2205453550  | 0.8395725779  |
| O | 0.3091752072  | -1.8283389053 | -1.0161405902 |
| H | 1.7907246852  | -2.0260901219 | 0.4560237007  |
| H | 0.3122295337  | 1.9309131242  | 1.2424112578  |
| O | -1.3506647979 | 2.0410779640  | -0.0081823913 |
| H | -1.4453883542 | 2.8941336547  | 0.4288218067  |
| H | 0.4261322634  | -1.2449052530 | -1.7978282296 |
| H | -0.4656549321 | 1.3387480201  | -2.1934945502 |

B3LYP-D/TZVP

|   |               |               |               |
|---|---------------|---------------|---------------|
| C | 1.1042488346  | -1.2325952721 | 0.2005423518  |
| C | 1.8087523306  | 0.0393289882  | -0.3021657959 |
| C | 0.7616002405  | 1.0852850857  | -0.6815002449 |
| C | -0.2449129938 | 1.3214381790  | 0.4673421548  |
| C | -0.6899666296 | 0.0476593565  | 1.2641207577  |
| O | 0.2740143826  | -1.0519922906 | 1.2467559507  |
| O | 2.5494279177  | 0.5851268267  | 0.7659163363  |
| O | 0.1122694561  | 0.6061734389  | -1.8676545626 |

|   |               |               |               |
|---|---------------|---------------|---------------|
| C | -2.0430090915 | -0.5443867527 | 0.8749259287  |
| O | -2.0546208412 | -1.0259432761 | -0.4869455130 |
| H | 3.4117167369  | 0.1454600428  | 0.8406087286  |
| H | -2.1453846854 | -0.2520616089 | -1.0729305120 |
| H | -0.7465599517 | -1.6677632110 | -0.7875160243 |
| H | 2.4294751352  | -0.1914331529 | -1.1787752919 |
| H | 1.2708177904  | 2.0302383574  | -0.8970058522 |
| H | -0.7475629844 | 0.3078260865  | 2.3251360310  |
| H | -2.2431865160 | -1.4164961257 | 1.5003853353  |
| H | -2.8447628755 | 0.1838999302  | 1.0084032423  |
| O | 0.2790085719  | -1.8304446326 | -1.0129026619 |
| H | 1.7777139541  | -2.0544886660 | 0.4402325503  |
| H | 0.2472398659  | 1.9945218422  | 1.1755689318  |
| O | -1.3780795144 | 1.9460955926  | -0.1386946656 |
| H | -1.6825642857 | 2.6894852213  | 0.4045350065  |
| H | 0.3953623599  | -1.2264479784 | -1.7904861710 |
| H | -0.4250369895 | 1.3280825084  | -2.2347646528 |

### TS2-3

B3LYP/6-31G(d)

|   |               |               |               |
|---|---------------|---------------|---------------|
| C | 1.2607890233  | -1.0739448571 | 0.4093733817  |
| C | 1.8233738669  | 0.1685809259  | -0.3093219923 |
| C | 0.6348041930  | 0.9737778726  | -0.8451128105 |
| C | -0.3519852525 | 1.3476985653  | 0.2679212551  |
| C | -0.7175143491 | 0.1700466622  | 1.2242162785  |
| O | 0.3564228629  | -0.7869113268 | 1.4112670424  |
| O | 2.4696834482  | 1.0395359222  | 0.5867959070  |
| O | -0.0770848022 | 0.1169531871  | -1.8330173965 |
| C | -2.0305869457 | -0.5500079838 | 0.9177907653  |
| O | -1.9787758021 | -1.1647103268 | -0.3809622880 |
| H | 3.3719383572  | 0.7274136575  | 0.7622632012  |
| H | -1.0490882489 | 0.2798555436  | -1.7144374416 |
| H | -2.8492944846 | -1.5512974409 | -0.5705153868 |
| H | 2.4693730551  | -0.1533047492 | -1.1377017680 |
| H | 0.9616762588  | 1.8567251956  | -1.3961887893 |
| H | -0.8503540603 | 0.5963623010  | 2.2227912816  |
| H | -2.1814071171 | -1.3100291068 | 1.6940988189  |
| H | -2.8444859944 | 0.1796534911  | 0.9665361561  |
| O | 0.6652933465  | -1.8753342641 | -0.6780975699 |
| H | 2.0403231824  | -1.6822526401 | 0.8728064690  |
| H | 0.1241990291  | 2.1355856958  | 0.8596756515  |
| O | -1.5587105078 | 1.7969213489  | -0.3423954274 |
| H | -1.5090509620 | 2.7528257266  | -0.5077178849 |

|   |               |               |               |
|---|---------------|---------------|---------------|
| H | -0.0786801802 | -2.3929900620 | -0.3087010243 |
| H | 0.1182782113  | -0.9132314595 | -1.4813718971 |

B3LYP/6-311++G(d,p)

|   |               |               |               |
|---|---------------|---------------|---------------|
| C | 1.2544912850  | -1.0711948592 | 0.4101496169  |
| C | 1.8217422425  | 0.1725646306  | -0.3015176534 |
| C | 0.6363449106  | 0.9722714906  | -0.8497415838 |
| C | -0.3536712377 | 1.3451015378  | 0.2576607132  |
| C | -0.7293131155 | 0.1725560054  | 1.2162504427  |
| O | 0.3406259301  | -0.7992222950 | 1.3976004765  |
| O | 2.4705401027  | 1.0332323285  | 0.6037127528  |
| O | -0.0410994260 | 0.1056868566  | -1.8407432871 |
| C | -2.0476528260 | -0.5404787411 | 0.9335967911  |
| O | -2.0077295870 | -1.2023002381 | -0.3429123160 |
| H | 3.3855349897  | 0.7628520223  | 0.7419189694  |
| H | -0.9985827673 | 0.3134029255  | -1.8354668376 |
| H | -2.8735597452 | -1.5861151162 | -0.5243827386 |
| H | 2.4741950681  | -0.1465774890 | -1.1214795567 |
| H | 0.9680776620  | 1.8588372643  | -1.3882013003 |
| H | -0.8441520844 | 0.6019882436  | 2.2133520969  |
| H | -2.2064185991 | -1.2705634450 | 1.7328004951  |
| H | -2.8507460683 | 0.1991851746  | 0.9547130746  |
| O | 0.6597238430  | -1.8612638511 | -0.7045973876 |
| H | 2.0254330602  | -1.6942227368 | 0.8618958183  |
| H | 0.1247841739  | 2.1260560650  | 0.8520936777  |
| O | -1.5491502179 | 1.8185790024  | -0.3581725819 |
| H | -1.5438588373 | 2.7809152075  | -0.4181147503 |
| H | -0.0336807904 | -2.4465165220 | -0.3555911104 |
| H | 0.1372581619  | -0.9568515829 | -1.4448292899 |

B3LYP-D/TZVP

|   |             |             |             |
|---|-------------|-------------|-------------|
| C | 1.25449133  | -1.07119489 | 0.41014960  |
| C | 1.82174230  | 0.17256463  | -0.30151767 |
| C | 0.63634491  | 0.97227150  | -0.84974158 |
| C | -0.35367122 | 1.34510159  | 0.25766072  |
| C | -0.72931314 | 0.17255600  | 1.21625042  |
| O | 0.34062594  | -0.79922229 | 1.39760053  |
| O | 2.47054005  | 1.03323233  | 0.60371274  |
| O | -0.04109943 | 0.10568686  | -1.84074330 |
| C | -2.04765272 | -0.54047877 | 0.93359679  |
| O | -2.00772953 | -1.20230019 | -0.34291232 |
| H | 3.38553500  | 0.76285201  | 0.74191898  |
| H | -0.99858278 | 0.31340292  | -1.83546686 |
| H | -2.87355971 | -1.58611512 | -0.52438277 |



|   |             |             |             |
|---|-------------|-------------|-------------|
| H | 2.47419500  | -0.14657749 | -1.12147951 |
| H | 0.96807766  | 1.85883725  | -1.38820136 |
| H | -0.84415209 | 0.60198826  | 2.21335220  |
| H | -2.20641851 | -1.27056348 | 1.73280048  |
| H | -2.85074615 | 0.19918518  | 0.95471305  |
| O | 0.65972382  | -1.86126387 | -0.70459741 |
| H | 2.02543306  | -1.69422269 | 0.86189580  |
| H | 0.12478418  | 2.12605596  | 0.85209370  |
| O | -1.54915023 | 1.81857896  | -0.35817257 |
| H | -1.54385889 | 2.78091526  | -0.41811475 |
| H | -0.03368079 | -2.44651651 | -0.35559112 |
| H | 0.13725816  | -0.95685160 | -1.44482934 |

### TS1-3

B3LYP/6-31G(d)

|   |               |               |               |
|---|---------------|---------------|---------------|
| C | -1.1840367616 | 1.2410622114  | -0.0246589109 |
| C | -1.7566789596 | -0.1648281067 | -0.3004072694 |
| C | -0.5880964861 | -1.1449996984 | -0.4687865917 |
| C | 0.2514009677  | -1.1659620830 | 0.8113298112  |
| C | 0.7379518066  | 0.2504923339  | 1.2240151499  |
| O | -0.2408883517 | 1.2881188681  | 1.0041028204  |
| O | -2.4902925394 | -0.6604811648 | 0.7961154382  |
| O | 0.2532294200  | -0.7075044797 | -1.6322394479 |
| C | 2.1247764079  | 0.6150098336  | 0.6851829308  |
| O | 2.2713748896  | 0.3717260260  | -0.7466177013 |
| H | -3.3971485754 | -0.3159546680 | 0.7688393344  |
| H | 1.2305725076  | -0.3651334980 | -1.2904252806 |
| H | 2.5044840347  | 1.1869416151  | -1.2183871814 |
| H | -2.3582129996 | -0.1229220325 | -1.2187869130 |
| H | -0.9339301278 | -2.1441468420 | -0.7352217538 |
| H | 0.8645265098  | 0.2443580378  | 2.3117838046  |
| H | 2.3225949062  | 1.6689822044  | 0.8936705234  |
| H | 2.8727243014  | -0.0049079337 | 1.1800422083  |
| O | -0.6580409401 | 1.6681430729  | -1.2934561700 |
| H | -1.9766538624 | 1.9257690638  | 0.2914536181  |
| H | -0.4268348449 | -1.5303807348 | 1.5906171470  |
| O | 1.4014456293  | -1.9773825869 | 0.6779657168  |
| H | 1.1756999305  | -2.9028957133 | 0.8637683779  |
| H | -0.4892182885 | 2.6248525817  | -1.2876255315 |
| H | -0.1302707842 | 0.1456398728  | -1.9801355296 |

B3LYP/6-311++G(d,p)

|   |              |               |              |
|---|--------------|---------------|--------------|
| C | 1.3810210751 | -1.0065862390 | 0.4264581843 |
|---|--------------|---------------|--------------|

|   |               |               |               |
|---|---------------|---------------|---------------|
| C | 1.7620174041  | 0.2576855878  | -0.3699105008 |
| C | 0.4825314870  | 0.9338702129  | -0.8815519001 |
| C | -0.4056827088 | 1.3050722394  | 0.3075306181  |
| C | -0.7168659044 | 0.0879679682  | 1.2200770997  |
| O | 0.4159947479  | -0.7831887175 | 1.4160683009  |
| O | 2.3863645997  | 1.2314067701  | 0.4378498760  |
| O | -0.2463662090 | 0.0031102892  | -1.7989497764 |
| C | -1.9993883468 | -0.6632474290 | 0.8604784223  |
| O | -2.0893535706 | -0.9592574470 | -0.5695244690 |
| H | 3.3270043428  | 1.0438611610  | 0.5328892856  |
| H | -1.1516425454 | -0.4246206627 | -1.3133614892 |
| H | -2.4169348505 | -1.8482524170 | -0.7482426227 |
| H | 2.3980415283  | -0.0415630634 | -1.2109846388 |
| H | 0.7108842219  | 1.8079840468  | -1.4884952501 |
| H | -0.9099995385 | 0.4800956703  | 2.2219162839  |
| H | -2.0313423514 | -1.5981729704 | 1.4195096717  |
| H | -2.8597699851 | -0.0433624786 | 1.1067167984  |
| O | 0.9595263373  | -1.9548922865 | -0.5628229972 |
| H | 2.2463838592  | -1.3951096405 | 0.9670323422  |
| H | 0.1851395472  | 2.0155953061  | 0.8902600573  |
| O | -1.6427443177 | 1.8560935987  | -0.1040354843 |
| H | -1.5864342984 | 2.8163068479  | -0.1621397358 |
| H | 1.0337699202  | -2.8556059995 | -0.2258817656 |
| H | 0.3091384360  | -0.7893905330 | -1.9541159505 |

#### B3LYP-D/TZVP

|   |            |            |            |
|---|------------|------------|------------|
| C | -1.2294847 | 1.2407616  | -0.0314043 |
| C | -1.7973390 | -0.1578987 | -0.3408093 |
| C | -0.6384076 | -1.1445917 | -0.5064880 |
| C | 0.1981180  | -1.1685070 | 0.7709674  |
| C | 0.6831001  | 0.2409527  | 1.1936841  |
| O | -0.3208341 | 1.2601490  | 1.0293526  |
| O | -2.5654207 | -0.6683994 | 0.7249124  |
| O | 0.2015935  | -0.7307562 | -1.6714340 |
| C | 2.0467444  | 0.6370456  | 0.6344069  |
| O | 2.1667565  | 0.3737209  | -0.7992273 |
| H | -3.4553842 | -0.2981952 | 0.7024031  |
| H | 1.1667969  | -0.2900835 | -1.3327087 |
| H | 2.5772091  | 1.1068614  | -1.2740246 |
| H | -2.3758308 | -0.0965529 | -1.2690430 |
| H | -0.9995730 | -2.1398397 | -0.7525019 |
| H | 0.8410229  | 0.2087664  | 2.2728557  |
| H | 2.2038844  | 1.6996033  | 0.8153366  |
| H | 2.8151675  | 0.0447965  | 1.1266899  |

|   |            |            |            |
|---|------------|------------|------------|
| O | -0.6578208 | 1.6934859  | -1.2656326 |
| H | -2.0308849 | 1.9143045  | 0.2762874  |
| H | -0.4829257 | -1.5264665 | 1.5454566  |
| O | 1.3409059  | -1.9921823 | 0.6438440  |
| H | 1.1260636  | -2.9000958 | 0.8864628  |
| H | -0.5869763 | 2.6553122  | -1.2715977 |
| H | -0.2264810 | 0.0378088  | -2.1077882 |
